# Supplementary material for: Phosphate Uptake and Its Relation to Arsenic Toxicity in Lactobacilli
Source: MDPI journal article supplement (doi:10.3390/ijms25095017), 2024-05-04
Supplement: s1 [file s1]

**Supplementary Table S1.** Oligonucleotides used in this study

| Oligonucleotide             | Sequence                                    | Use                                                    |
|-----------------------------|---------------------------------------------|--------------------------------------------------------|
| <b><i>Lp. plantarum</i></b> |                                             |                                                        |
| phoP-For                    | TTTTCTCGAGTGTGACGGCTAAAAATGATG              | Disruption of <i>phoP</i> in <i>Lp. plantarum</i>      |
| phoP-Rev                    | TTTTCTGCAGAAATTCCTTTGGTGTCAAGC              |                                                        |
| phoP-C                      | CCACAAATTCGTAGCCAAAG                        |                                                        |
| pstC-For                    | TTTTCTCGAGTTCTACTTTGTTGCATCACG              | Disruption of <i>pstC</i> in <i>Lp. plantarum</i>      |
| pstC-Rev                    | TTTTCTGCAGAAAGGTCCCAGAAAGAATCC              |                                                        |
| pstC-C                      | TTTATAAATTGTTTGCCAGCG                       |                                                        |
| phoU-For                    | TTTTCTCGAGACGGGAAGTTGAAGTAGAAC              | Disruption of <i>phoU</i> in <i>Lp. plantarum</i>      |
| phoU-Rev                    | TTTTCTGCAGATACATCTCCCCGACTTTTG              |                                                        |
| phoU-C                      | ATTCAAGTAATCCGTGGAAC                        |                                                        |
| <b><i>Lc. paracasei</i></b> |                                             |                                                        |
| pstCLcas-For                | TCAAAGCTTCGCACGGCAATCCCGAAGTTG              | Disruption of <i>pstC</i> in <i>Lc. paracasei</i> BL23 |
| pstCLcas-Rev                | TCAGAATTCCCGAATCGCAGCACGTAGAACC             |                                                        |
| pstCLcas-C                  | TCAGTTTAATTGTGATTGTGG                       |                                                        |
| phoULcas-For                | ACGAAGCTTCGAATTGATTGCACTGCAG                | Disruption of <i>phoU</i> in <i>Lc. paracasei</i> BL23 |
| phoULcas-Rev                | ATGGAATTCCATTGATCCCATGGTCTTC                |                                                        |
| phoULcas-C                  | ATGAACGTGAAGTAGATTGG                        |                                                        |
| dphoP-F1                    | ATATCGAATTCCTGCAGCCCAGGTGCGACCTTCATGACTC    | Amplification of <i>phoP</i> 5' arm                    |
| dphoP-R1                    | TCGCGTAAATGGCTGACCTGCGCAGGTTGTCATCAACAA     |                                                        |
| dphoP-F2                    | TTGTTGATGACGAACCTGCGCAGGTGAGCCATTACGCGA     | Amplification of <i>phoP</i> 3' arm                    |
| dphoP-R2                    | CTAGAACTAGTGGATCCCCGCAAAGGCAAGCGTTAGGAG     |                                                        |
| dphoR-F1                    | ATATCGAATTCCTGCAGCCCCATAATCTAGATCGCATCCGTCG | Amplification of <i>phoR</i> 5' arm                    |

|          |                                         |                                     |
|----------|-----------------------------------------|-------------------------------------|
| dphoR-R1 | CACAGGCAAAGTGACCGTGACATTCCCGACAAAGTCCAG |                                     |
| dphoR-F2 | CTGGACTTTGTCGGGAATGTCACGGTCACTTGCCTGTG  | Amplification of <i>phoR</i> 3' arm |
| dphoR-R2 | CTAGAACTAGTGGATCCCCCAGCTGTGCCATCGAGAC   |                                     |
| CphoP-F  | atgttataatacaagtatcaTTTCCGAGGAGACAGCATG | Cloning of <i>phoP</i> into pT1NX   |
| CphoP-R  | tttgtagcagccggatctaTTATTCATGGGGTGCCTCC  |                                     |
| CphoR-F  | atgttataatacaagtatcaATACCAAATGGAGGCACCC | Cloning of <i>phoR</i> into pT1NX   |
| CphoR-R  | tttgtagcagccggatctaTTTTTCATCCTCTGTGCGG  |                                     |

The underlined nucleotides correspond to restriction sites introduced for cloning into pRV300. Oligonucleotides with a “-C” suffix in their names served to confirm plasmid integration at the correct locus. Nucleotides in lowercase are 5' extensions for creating homology with pT1NX for the Gibson assembly reactions.
