# Supplementary material for: Phosphate Uptake and Its Relation to Arsenic Toxicity in Lactobacilli
Source: MDPI journal article supplement (doi:10.3390/ijms25095017), 2024-05-04
Supplement: s1 [file s1]

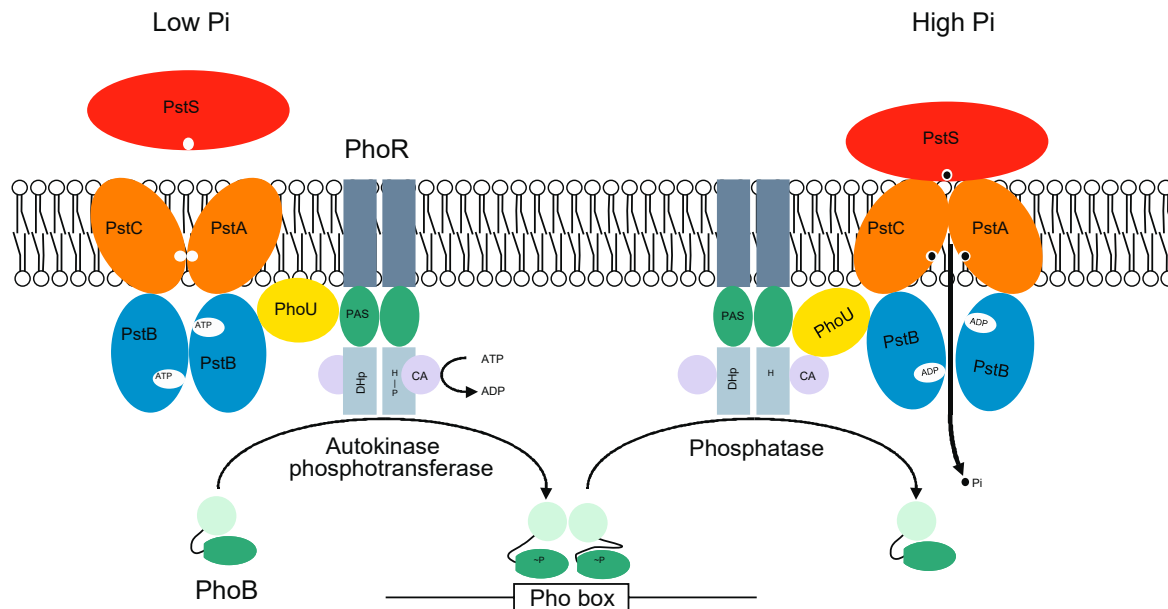

**Supplementary Figure S1.** Schematic representation of phosphate transport through the Pst transporter and signal transduction of PhoBR two component system in *E. coli*. When environmental phosphate is abundant, the Pst transporter signals through PhoU to induce PhoR phosphatase conformation. When Pi concentration is low, the transporter and PhoU induce PhoR autokinase conformation. The output of the signal transduction system relies on the phosphorylation state of the response regulator PhoB. Phospho-PhoB forms a dimer that binds specifically to DNA Pho boxes. Based on the model proposed by Gardner and McCleary (doi:10.1128/ecosalplus.ESP-0006-2019).

- species\_Sharpea azabuensis
- species\_Aplactobacillus apinorum
- species\_Bombilactobacillus mellei
- strain\_Holzapfelia floricola DSM 23037 \_JCM 16512
- strain\_Pediococcus pentosaceus ATCC 25745
- strain\_Ligilactobacillus salivarius UCC118
- strain\_Furtunilactobacillus rossiae DSM 15814
- strain\_Paucilactobacillus hokkaidonensis JCM 18461
- strain\_Dellagloia algida DSM 15638
- species\_Lactobacillus sp ASF360
- strain\_Agilactobacillus composti DSM 18527 \_JCM 14202
- strain\_Lactocaseibacillus plantarum WCF51
- strain\_Latilactobacillus sakei subsp sakei 23K
- strain\_Loigolactobacillus biferrmentans DSM 20003
- strain\_Loigolactobacillus biferrmentans DSM 20003
- strain\_Amyolactobacillus amylophilus DSM 20533 \_JCM 1125
- strain\_Amyolactobacillus amylophilus DSM 20533 \_JCM 1125
- strain\_Liquorilactobacillus nagelli DSM 13675
- strain\_Liquorilactobacillus nagelli DSM 13675
- strain\_Limosilactobacillus pontis DSM 8475
- strain\_Limosilactobacillus pontis DSM 8475
- strain\_Lentilactobacillus buchneri ATCC 11577
- strain\_Lentilactobacillus buchneri ATCC 11577
- strain\_Fructilactobacillus florum DSM 22689 \_JCM 16035
- strain\_Fructilactobacillus florum DSM 22689 \_JCM 16035
- species\_Schleiferilactobacillus harbinensis
- species\_Schleiferilactobacillus harbinensis
- species\_Secundilactobacillus paracollinoides
- species\_Secundilactobacillus paracollinoides
- species\_Companilactobacillus hellongiangensis
- species\_Companilactobacillus hellongiangensis
- species\_Levilactobacillus parabrevis
- species\_Levilactobacillus parabrevis
- species\_Lactocaseibacillus rhamnosus
- strain\_Lactocaseibacillus paracasei ATCC 334
- strain\_Lactocaseibacillus pantheris DSM 15945 \_JCM 12539 \_NBRC 106106
- strain\_Lactocaseibacillus pantheris DSM 15945 \_JCM 12539 \_NBRC 106106

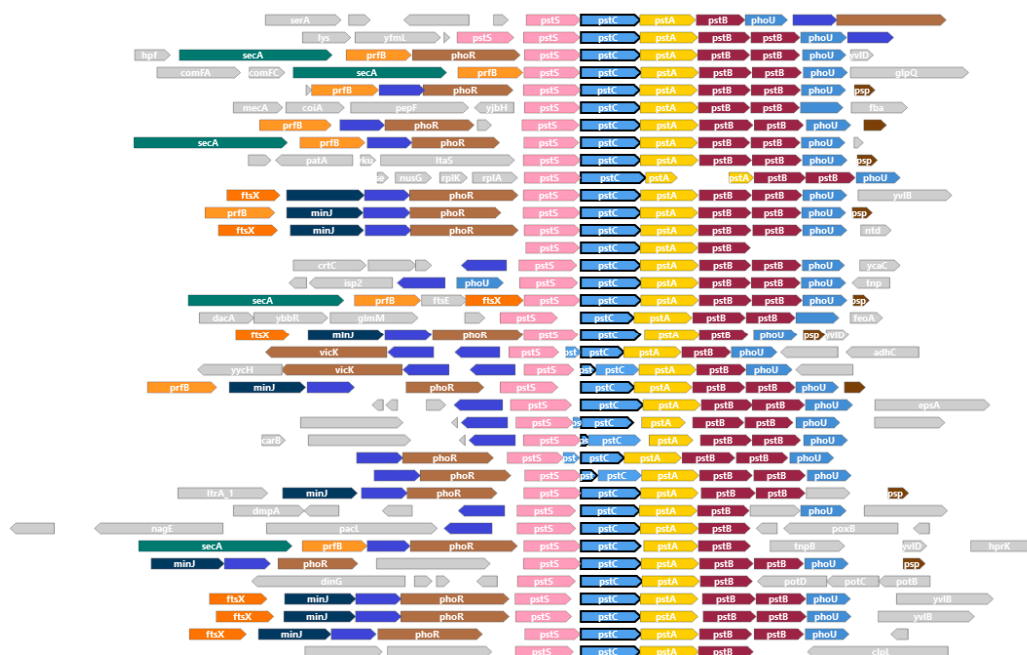

**Supplementary Figure S2.** Genomic context of *pstSCAB* genes in members of family *Lactobacillaceae*. The *phoP* genes, which in most cases precede the gene encoding the sensor kinase PhoR are depicted in dark blue color. In some strains, two *pstSCBA* operons exists, in which one of them is clustered with *phoPR* genes. The gene encoding a putative transmembrane protein with a PDZ domain, located upstream *phoP*, is annotated in most genomes as *minJ*, due to the homologies with MinJ from *Bacillus subtilis*. The comparisons were carried out with The Genomic Context Visualizer (GeCoViz; <https://gecoviz.cgmlab.org/>; Jorge Botas, Álvaro Rodríguez del Río, Joaquín Giner-Lamia, and Jaime Huerta-Cepas. (2022). GeCoViz: genomic context visualisation of prokaryotic genes from a functional and evolutionary perspective. Nucleic Acids Research, 50, W352–W357; doi.org/10.1093/nar/gkac367).

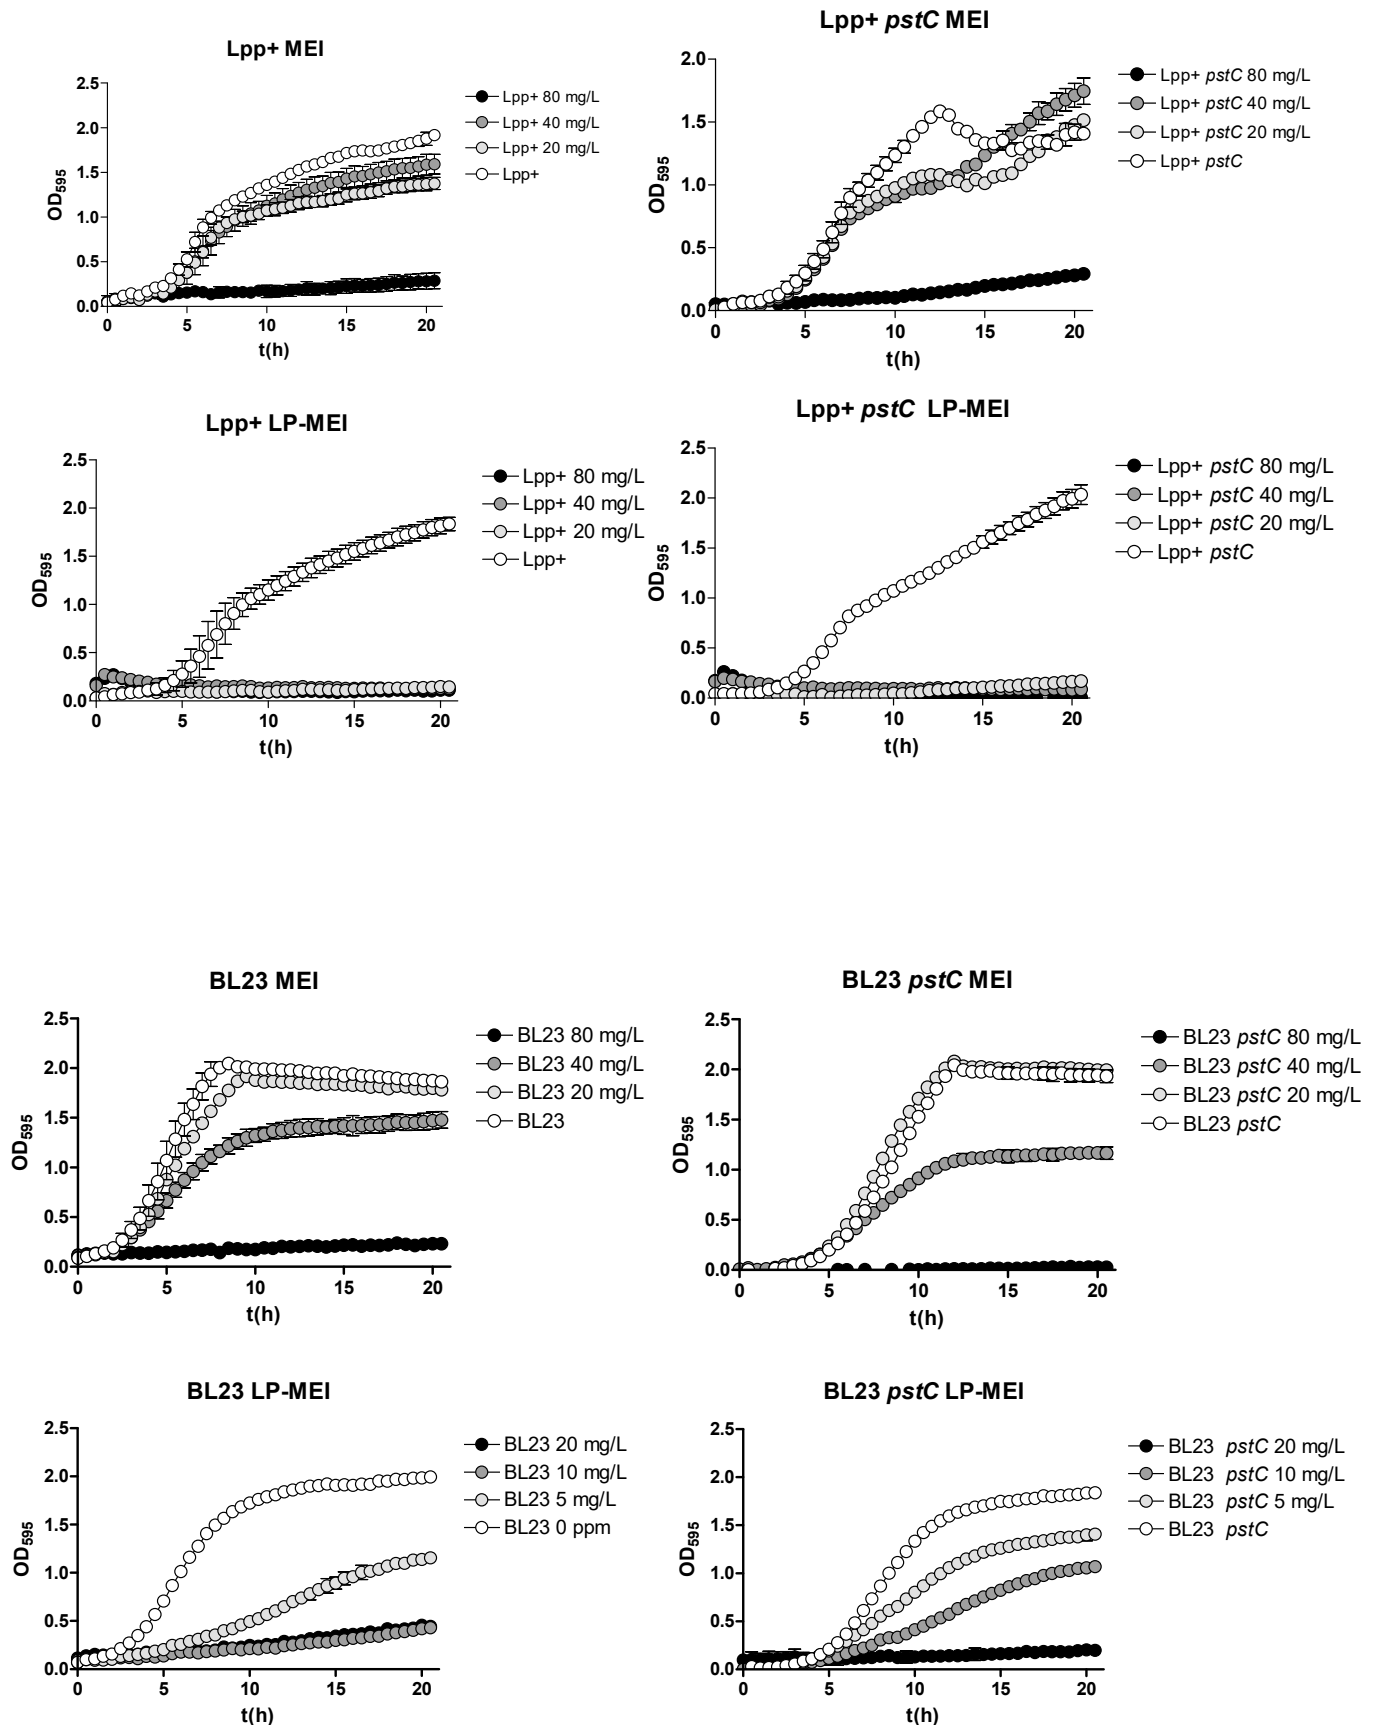

**Supplementary Figure S3.** Growth of *Lp. plantarum* Lpp+ and *Lc. paracasei* BL23 strains and their derivative *pstC* mutants in MEI and LP-MEI media with different concentrations of As(V).

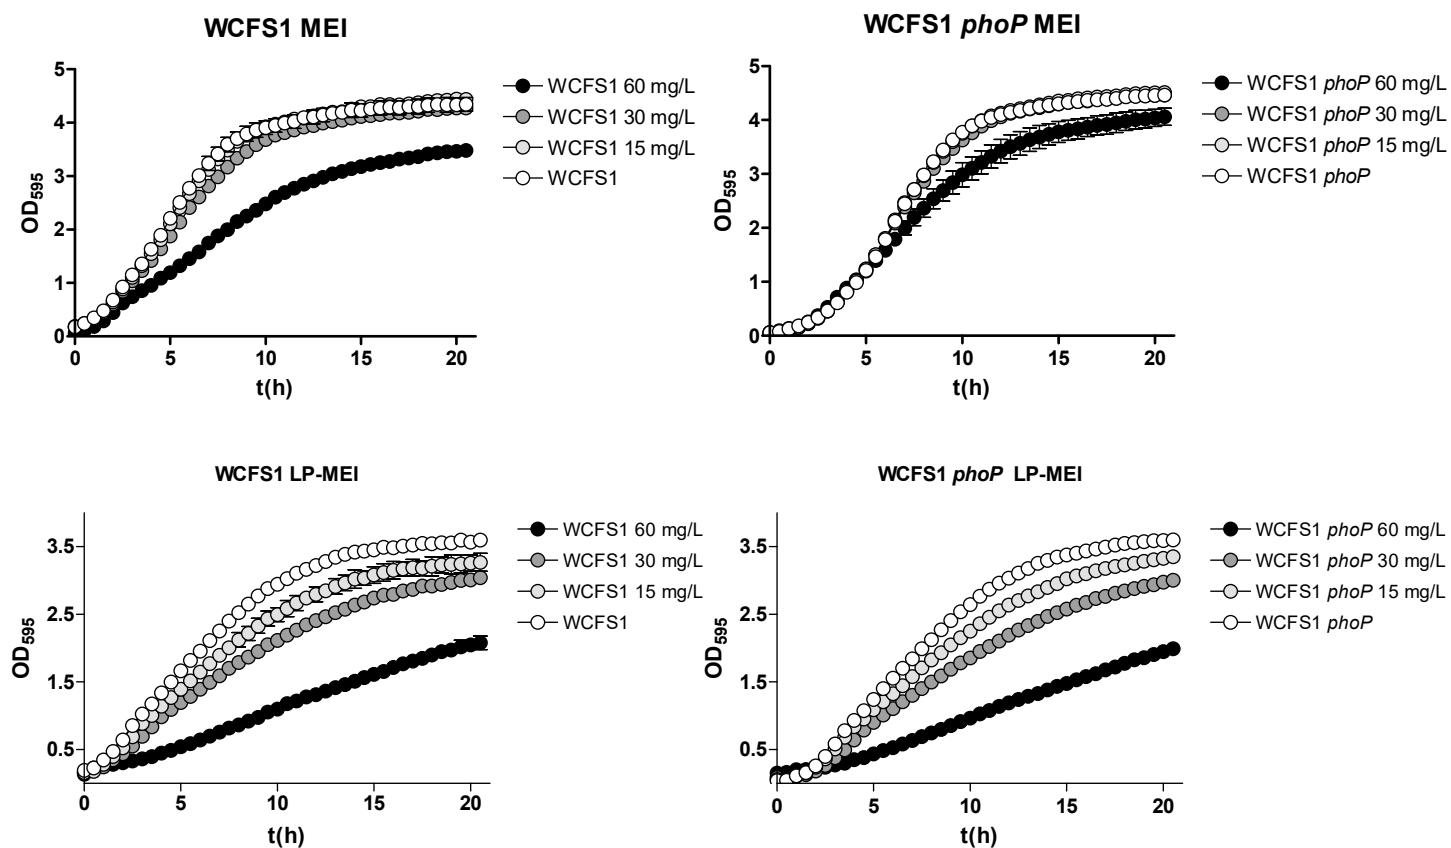

**Supplementary Figure S4.** Growth curves of *Lp. plantarum* WCFS1 and its derivative *phoP* mutant in MEI medium with different amounts of As(III).
